# Supplementary material
Source: publisher figshare collection journal article supplement (https://acs.figshare.com/ndownloader/files/21743877)
Supplement: Supplementary file 1 [file 21743877]

# Supporting information

## The Effect of Illite on the Crystallization of Poly(vinylidene fluoride)

*Tiantian Song<sup>1</sup>, Shaojuan Wang<sup>2</sup>, Haijun Wang<sup>2</sup>, Xiaoli Sun<sup>1\*</sup>, Huihui Li<sup>1</sup>, Shouke Yan<sup>1,2\*</sup>*

1. State Key Laboratory of Chemical Resource Engineering, Beijing Advanced Innovation Center for Soft Matter Science and Engineering, Beijing University of Chemical Technology, Beijing 100029, China

2. Key Laboratory of Rubber-Plastics, Ministry of Education/Shandong Provincial Key Laboratory of Rubber-plastics, Qingdao University of Science & Technology, Qingdao 266042, China

E-mail: xiaolisun@mail.buct.edu.cn\*; skyan@qust.edu.cn\*

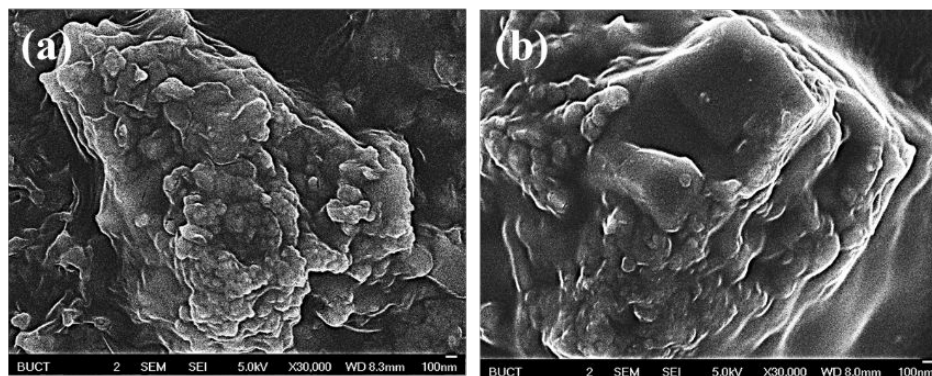

Figure S1. Morphologies of (a) illite and (b) CTAB modified illite viewed by scanning electron microscopy.

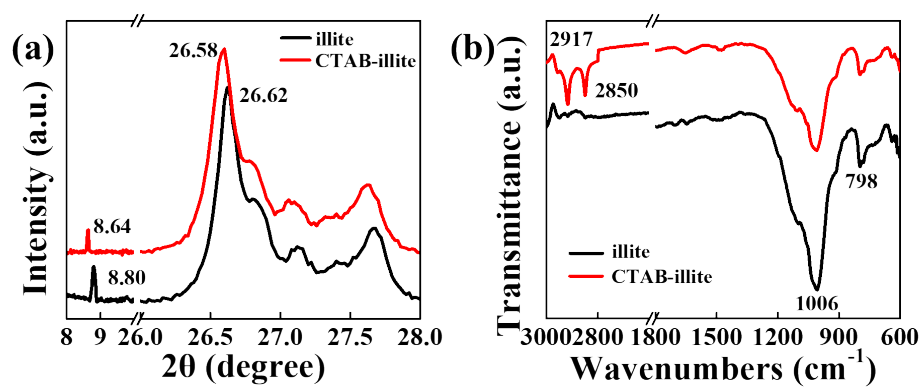

Figure S2. (a) WAXD patterns and (b) ATR spectra of illite before and after CTAB modification.

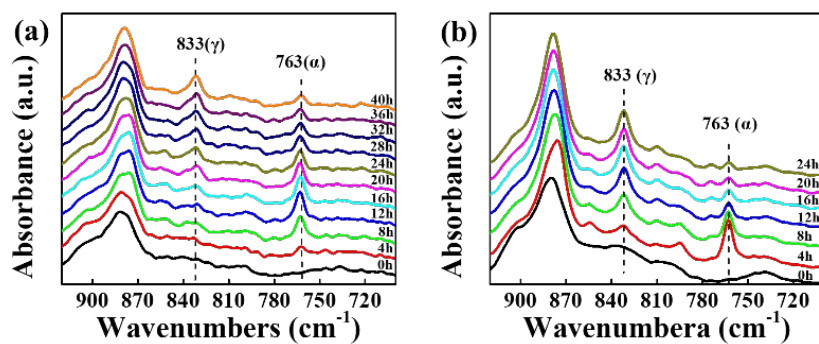

Figure S3. The time-resolved FTIR spectra of (a) PVDF and (b) PVDF<sub>m-0.5</sub> taken after isothermal crystallized at 160 °C.
